# Supplementary material for: Tunable metacrylated silk fibroin-based hybrid bioinks for the bioprinting of tissue engineering scaffolds
Source: Royal Society of Chemistry journal article supplement (doi:10.1039/d2bm01978g), 2023-01-01
Supplement: d2bm01978g1.pdf [file d2bm01978g1.pdf]

## Tunable methacrylated silk fibroin-based hybrid bioinks for bioprinting of tissue engineering scaffolds

Jin Yang, Zhihui Li, Shikai Li, Qianqian Zhang, Xiaojun Zhou, Chuanglong He\*

Shanghai Engineering Research Center of Nano-Biomaterials and Regenerative Medicine; College of Biological Science and Medical Engineering, Donghua University, Shanghai 201620, P. R. China.

\*Corresponding author: Chuanglong He, E-mail: hcl@dhu.edu.cn (C.L. He).

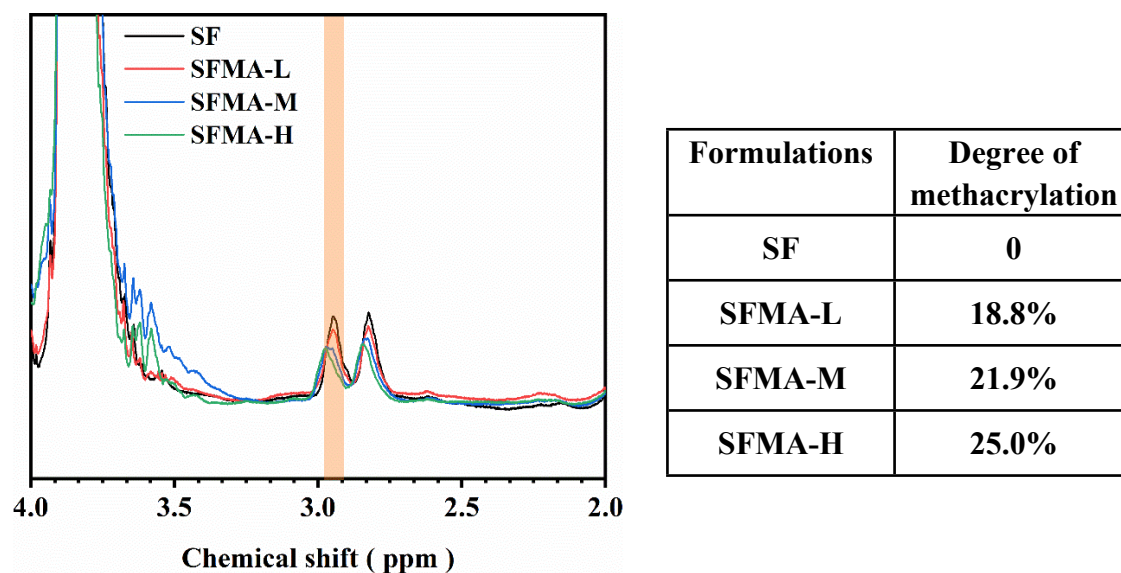

**Fig. S1.**  $^1\text{H-NMR}$  spectra and methylation degrees of SFMA-L, SFMA-M and SFMA-H. The silk fibroin (SF) was used as control.

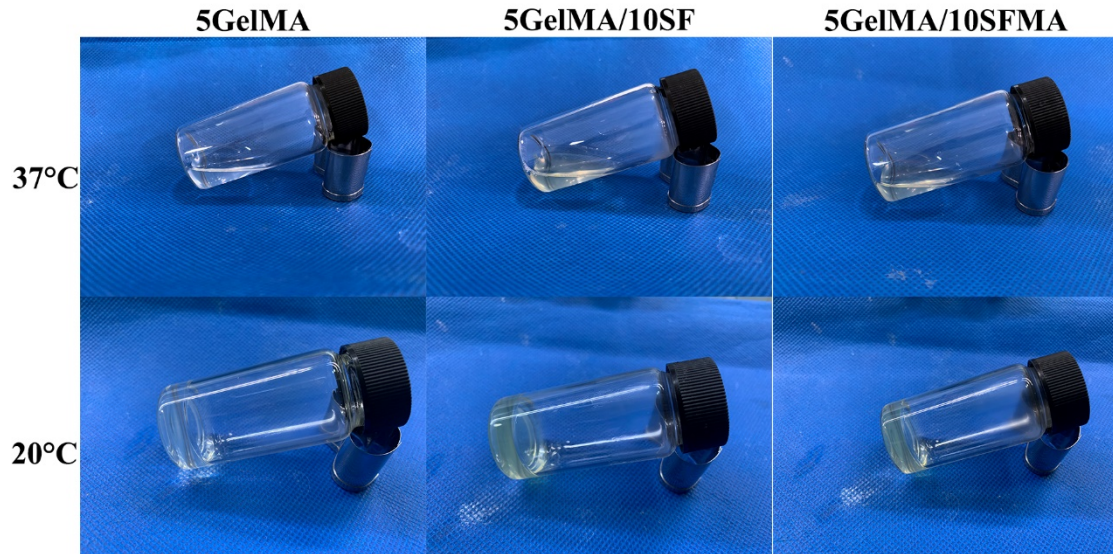

**Fig. S2.** Sol-gel transition of 5GelMA, 5GelMA/10SF, 5GelMA/10SFMA bioinks solution at 37°C and 20°C.

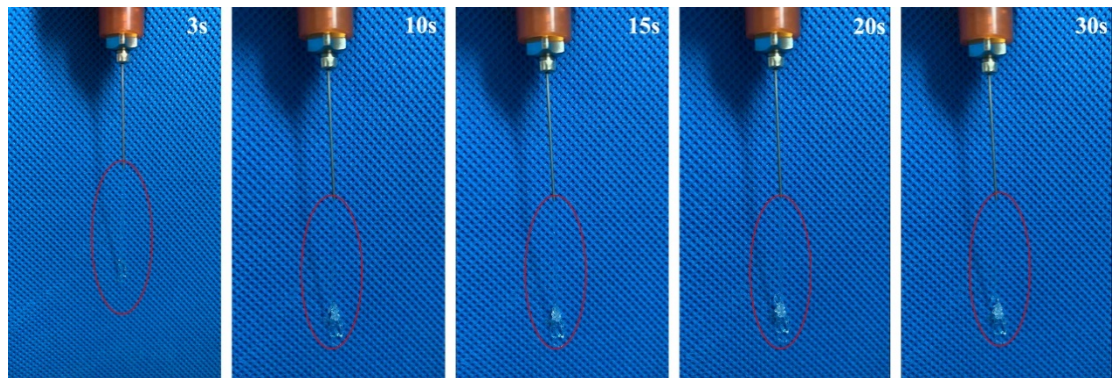

**Fig. S3.** (A) Continuous extrusion of 5GelMA/10SFMA-M bioink at different time points.

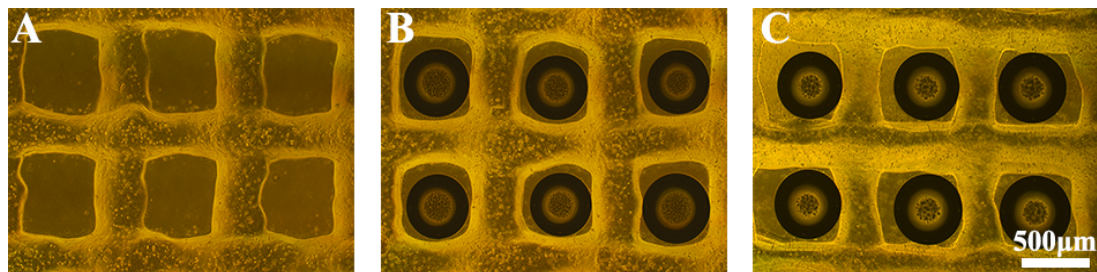

**Fig. S4.** Photographs of grid structure printed with 5GelMA/10SFMA-M bioink. (A) 2 layers, (B) 4 layers, and (C) 6 layers of the 3D printed 5GelMA/10SFMA-M constructs.
